# Supplementary material for: Effects of laser process parameters on the hardness profile of AISI 4340 cylindrical samples: statistical and experimental analyses
Source: Research Square preprint supplement (doi:10.21203/rs.3.rs-1297463/v1), 2022-02-01
Supplement: Supplementary file 1 [file 393d062ef1a8e583fdcb4901.docx]

**Highlights:**

- Laser surface hardening of cylindrical AISI 4340 steel specimens was studied using experimental and DOE approach.
- Laser power, laser feed speed and sample rotation speed were selected as input variables.
- Geometry of the hardened area, micro hardness and microstructure are investigated as output responses.
- Microhardness measurements revealed three distinct regions in the heat-affected zone (HAZ) of all samples.
